# Supplementary material for: Amino acids and acylcarnitine production by Chlorella vulgaris and Chlorella sorokiniana microalgae from wastewater culture
Source: PeerJ. 2019 Dec 3;7:e7977. doi: 10.7717/peerj.7977 (PMC6896938; doi:10.7717/peerj.7977)
Supplement: Supplemental Information 1 — Water biorremediation by treatments [file peerj-07-7977-s001.xlsx]

## Sheet: Data
Keys
T0									Cs L + Sh
Cond	pH	Turbidity	DO	OM	N	COD	BOD 5			pH	Turbidity	DO	OM	N	COD	BOD 5
2.08	8.5	130	2.91	1.36	0.2014	340	55		1.45	9.72	6.24	9.9	0.38	0.1016	210	32		St error = standard error; T0 = time zero; Cond = conductivity; mS= milisiemens; FTU = formazine turbidity unit; DO = dissolved oxygen; ppm = parts per million; OM = organic material; N = nitrogen; COD = chemical oxygen demand; BOD5 = biochemical oxygen demand after 5 d fermentation; mg/L= miligrams/liter. Average of three replicates. Diferent letters after the value in the same row represent sig…
2.58	8.35	115	2.82	1.02	0.27	340	61.4		1.56	10	7.83	5.96	0.7881	0.1576	190	40
2.01	8.2	100	2.78	0.72	0.117	325	30		1.34	8.52	9.07	6	0.48	0.096	250	27.7
2.22333	8.35	115	2.83667	1.03333	0.196133	335	48.8		1.45	9.41333	7.71333	7.28667	0.549367	0.1184	216.667	33.2333
0.310859	0.15	15	0.0665833	0.320208	0.0766358	8.66025	16.5928		0.11	0.786215	1.4186	2.2633	0.212709	0.0340635	30.5505	6.24206
Crl									Cs L
Cond	pH	Turbidity	DO	OM	N	COD	BOD 5		Cond	pH	Turbidity	DO	OM	N	COD	BOD 5
1.34	8.59	10.01	9.44	1.43	0.29	510	37		1.4	9.8	3.03	9.1	1.2	0.23	190	24
1.74	9.96	11.27	6.37	0.7881	0.1576	390	38.8		1.6	9.49	2.95	5.72	0.8397	0.1679	160	40
1.68	8.79	8.25	6.81	0.8894	0.236	320	37.3		1.24	8.75	3.24	5.85	1.03	0.1878	240	20.1
1.58667	9.11333	9.84333	7.54	1.03583	0.227867	406.667	37.7		1.41333	9.34667	3.07333	6.89	1.02323	0.195233	196.667	28.0333
0.215716	0.740023	1.51688	1.66009	0.345096	0.0665737	96.0902	0.964365		0.18037	0.539475	0.149778	1.91502	0.180245	0.0317103	40.4145	10.5453
																		Cond		St error			pH		St error
Cv L + Sh									Cs Sh											upper	lower				upper	lower
Cond	pH	Turbidity	DO	OM	N	COD	BOD 5		Cond	pH	Turbidity	DO	OM	N	COD	BOD 5	T0	2.22	0.311	2.531	1.909	T0	8.35	0.15	8.5	8.2
1.46	9.4	15.98	8.53	0.493	0.24	405	47.4		1.96	8.95	4.01	5.95	0.43	0.09	60	26.4	Crl	1.587	0.22	1.807	1.367	Crl	9.113	0.74	9.853	8.373
1.7	9.71	16.93	5.45	0.478	0.0956	330	51.5		1.73	9.09	4.94	6.76	0.41	0.0365	95	31.1	Cv L + Sh	1.48	0.21	1.69	1.27	Cv L + Sh	9.38	0.35	9.73	9.03
1.29	9.02	20	5.96	0.48	0.096	410	36		1.59	8.39	4.96	6.36	0.506	0.101	100	27.5	Cv L	1.41	0.19	1.6	1.22	Cv L	9.42	0.4	9.82	9.02
1.48333	9.37667	17.6367	6.64667	0.483667	0.143867	381.667	44.9667		1.76	8.81	4.63667	6.35667	0.448667	0.0758333	85	28.3333	Cv Sh	1.72	0.26	1.98	1.46	Cv Sh	9.04	0.44	9.48	8.6
0.205994	0.345591	2.1011	1.65083	0.00814453	0.0832541	44.8144	8.0314		0.186815	0.370405	0.542801	0.40501	0.0506491	0.0345048	21.7945	2.45832	Cs L + Sh	1.5	0.1	1.6	1.4	Cs L + Sh	9.4	0.8	10.2	8.6
																	Cs L	1.41	0.18	1.59	1.23	Cs L	9.35	0.54	9.89	8.81
Cv L																	Cs Sh	1.76	0.189	1.949	1.571	Cs Sh	8.81	0.37	9.18	8.44
Cond	pH	Turbidity	DO	OM	N	COD	BOD 5		Table 1. Physicochemical parameters of “La Encantada stream water after inoculation with Chlorella sorokiniana and Chlorella vulgaris 13 d culture under light (L), agitation (Sh) or both (L + Sh ) conditions
1.35	9.82	2.4	8.4	1.33	0.27	150	38			T0	NC	C. vulgaris			C. sorokiniana				Turb		St error			DO		St error
1.62	9.42	2.38	5.7	0.7622	0.1524	147	41.6					L y Sh	L	Sh	L y Sh	L	Sh				upper	lower				upper	lower
1.26	9.03	3.07	6.05	0.9396	0.214	160	30		Cond (mS)	2.22± 0.311	1.587± 0.22	1.48± 0.21	1.41± 0.19	1.72± 0.26	1.5± 0.1	1.41± 0.18	1.76± 0.19	T0	115	15	130	100	T0	2.84	0.067	2.907	2.773
1.41	9.42333	2.61667	6.71667	1.0106	0.212133	152.333	36.5333		pH	8.35± .15	9.113± 0.74	9.38± 0.35	9.42± 0.4	9.04± 0.44	9.4± 0.8	9.35± 0.54	8.81± 0.37	Crl	9.843	1.52	11.363	8.323	Crl	7.54	1.66	9.2	5.88
0.18735	0.395011	0.392726	1.46828	0.290482	0.0588222	6.80686	5.93745		Turbidity (FTU)	115± 15	9.843± 1.52	17.64± 2.1	2.6167± 0.39	20.98± 4.25	7.7± 1.4	3.07± 0.15	4.6367± 0.54	Cv L + Sh	17.64	2.1	19.74	15.54	Cv L + Sh	6.65	1.65	8.3	5
									DO (ppm)	2.84± 0.067	7.54± 1.66	6.65± 1.65	6.72± 1.47	7.75± 1.87	7.3± 2.3	6.89± 1.92	6.3567± 0.41	Cv L	2.6167	0.39	3.0067	2.2267	Cv L	6.72	1.47	8.19	5.25
Cv Sh									OM total (%)	1.03± .32	1.036± 0.35	0.48± 0.01	1.0106± 0.29	1.06± 0.13	0.5± 0.2	1.02± 0.18	0.4± 0.05	Cv Sh	20.98	4.25	25.23	16.73	Cv Sh	7.75	1.87	9.62	5.88
Cond	pH	Turbidity	DO	OM	N	COD	BOD 5		N total (%)	0.2± 0.077	0.228± 0.07	0.14± 0.08	0.2121± 0.06	0.18± 0.07	0.1± 0	0.2± 0.03	0.1± 0.03	Cs L + Sh	7.7	1.4	9.1	6.3	Cs L + Sh	7.3	2.3	9.6	5
1.9	9	19.58	9.9	1.2	0.25	94	19.6		COD (mg/L)	335± 8.66	406.667± 96.09	381.67± 44.81	152.33± 6.81	91.33± 20.13	216.7± 30.6	196.67± 40.41	85± 21.79	Cs L	3.07	0.15	3.22	2.92	Cs L	6.89	1.92	8.81	4.97
1.84	9.49	25.76	6.65	0.9431	0.1886	70	27		BOD5 (mg/L)	48.8± 16.6	37.7± 0.96	44.97± 8.03	36.53± 5.94	21.13± 5.27	33.2± 6.2	28.03± 10.55	28.33± 2.46	Cs Sh	4.6367	0.54	5.1767	4.0967	Cs Sh	6.3567	0.41	6.7667	5.9467
1.43	8.62	17.61	6.68	1.03	0.112	110	16.8
1.72333	9.03667	20.9833	7.74333	1.0577	0.183533	91.3333	21.1333				St error					St error					St error					St error
0.255799	0.436157	4.25237	1.86779	0.130671	0.0691394	20.1329	5.27004		OM total (%)		upper	lower		N		upper	lower		COD		upper	lower		BOD 5		upper	lower
								T0	1.03	0.32	1.35	0.71	T0	0.2	0.077	0.277	0.123	T0	335	8.66	343.66	326.34	T0	48.8	16.6	65.4	32.2
								Crl	1.036	0.35	1.386	0.686	Crl	0.228	0.07	0.298	0.158	Crl	406.667	96	502.667	310.667	Crl	37.7	0.96	38.66	36.74
								Cv L + Sh	0.48	0.01	0.49	0.47	Cv L + Sh	0.14	0.08	0.22	0.06	Cv L + Sh	381.67	44.8	426.47	336.87	Cv L + Sh	44.97	8.03	53	36.94
								Cv L	1.0106	0.29	1.3006	0.7206	Cv L	0.2121	0.06	0.2721	0.1521	Cv L	152.33	6.81	159.14	145.52	Cv L	36.53	5.94	42.47	30.59
								Cv Sh	1.06	0.13	1.19	0.93	Cv Sh	0.18	0.07	0.25	0.11	Cv Sh	91.33	20.13	111.46	71.2	Cv Sh	21.13	5.27	26.4	15.86
								Cs L + Sh	0.5	0.2	0.7	0.3	Cs L + Sh	0.1	0	0.1	0.1	Cs L + Sh	216.7	30.6	247.3	186.1	Cs L + Sh	33.2	6.2	39.4	27
								Cs L	1.02	0.18	1.2	0.84	Cs L	0.2	0.03	0.23	0.17	Cs L	196.67	40.4	237.07	156.27	Cs L	28.03	10.55	38.58	17.48
								Cs Sh	0.4	0.05	0.45	0.35	Cs Sh	0.1	0.03	0.13	0.07	Cs Sh	85	21.79	106.79	63.21	Cs Sh	28.33	2.46	30.79	25.87
